# Supplementary material
Source: publisher site journal article supplement (https://www.dovepress.com/article/279719)
Supplement: Supplementary file 1 [file get_supplementary_file.php]

**Supplementary materials**

**Table S1** Baseline characteristics of the IS study population without T2DM

| **Variables#** | **Overall** | **HTPR** | **Non-HTPR** | ***p* value*** |
| --- | --- | --- | --- | --- |
| **(n = 426)** | **(n = 213)** | **(n = 213)** |
| Age, years | 68.3 ± 9.96 | 68.32 ± 10.46 | 68.27 ± 9.46 | 0.954 |
| Male, n (%) | 291 (68.31) | 139 (65.26) | 152 (71.36) | 0.176 |
| BMI,kg/m2 | 25.39 (23.33-27.34) | 25.34 (23.11-27.34) | 25.39 (23.44-27.45) | 0.396 |
| Active smoking, n (%) | 188 (44.13) | 89 (41.78) | 99 (46.48) | 0.307 |
| Drinking, n (%) | 131 (30.75) | 59 (27.70) | 72 (33.80) | 0.204 |
| Hypertension, n (%) | 138 (32.39) | 61 (28.64) | 77 (36.15) | 0.098 |
| Dyslipidemia, n (%) | 26 (6.10) | 11 (5.16) | 15 (7.04) | 0.418 |
| Coronary artery disease, n (%) | 162 (38.03) | 79 (37.09) | 83 (38.97) | 0.69 |
| Peripheral arterial disease, n (%) | 51 (11.97) | 20 (9.39) | 31 (14.55) | 0.101 |
| Previous PCI, n (%) | 41 (9.62) | 18 (8.45) | 23 (10.80) | 0.411 |
| Previous stroke, n (%) | 63 (14.79) | 30 (14.08) | 33 (15.49) | 0.682 |
| Platelet count, x109/L | 203 (173-239) | 208 (175.5-240.75) | 196.5 (170.75-229.25) | 0.092 |
| Leucocytes, x109/L | 6.06 (5.05-7.58) | 5.82 (4.95-7.29) | 6.34 (5.16-7.96) | 0.732 |
| Hemoglobin, g/dL | 135 (124-145) | 134 (121-144) | 136 (127-146) | 0.081 |
| Fasting blood glucose, mmol/L | 4.94 (4.57-5.46) | 4.97 (4.63-5.39) | 4.91 (4.5-5.54) | 0.688 |
| HbA1c,% | 5.9 (5.4-6.03) | 5.65 (5.3-6) | 5.9 (5.4-6.1) | 0.474 |
| TC, mmol/L | 4.19 (3.5-5.05) | 4.23 (3.56-5.17) | 3.92 (3.24-4.76) | 0.186 |
| LDL-C, mmol/L | 2.4 (1.9-3.04) | 2.41 (1.96-3.12) | 2.22 (1.68-2.87) | 0.244 |
| HDL-C, mmol/L | 1.1 (0.94-1.32) | 1.17 (1.01-1.39) | 1.09 (0.94-1.29) | 0.286 |
| TG, mmol/L | 1.22 (0.93-1.69) | 1.22 (0.92-1.72) | 1.23 (0.93-1.67) | 0.671 |
| BUN, mmol/L | 5.24 (4.35-6.21) | 5.24 (4.42-6.26) | 5.23 (4.18-6.2) | 0.586 |
| Cr, μmol/L | 85.5 (69-97) | 82.9 (65-95.5) | 87.6 (71-98.85) | 0.057 |
| UA, μmol/L | 316 (270.4-381.78) | 316.9 (272-385.8) | 314 (267-378) | 0.722 |
| HCY, μmol/L | 13.19 (9.2-15.63) | 4.69 (4.69-4.69) | 14.8 (11.14-16.05) | 0.143 |
| CRP, mg/L | 1.91 (1-5.17) | 1.94 (1.04-8.17) | 1.91 (0.98-3.72) | 0.55 |
| Insulin, n (%) | 24 (5.63) | 11 (5.16) | 13 (6.10) | 0.674 |
| Oral hypoglycemic agent, n (%) | 7 (1.64) | 1 (0.47) | 6 (2.82) | 0.122 |
| Aspirin, n (%) | 285 (66.90) | 135 (63.38) | 150 (70.42) | 0.122 |
| Statin, n (%) | 275 (64.55) | 132 (61.97) | 143 (67.14) | 0.265 |
| β-blocker, n (%) | 193 (45.31) | 92 (43.19) | 101 (47.42) | 0.381 |
| ACEI, n (%) | 87 (20.42) | 36 (16.90) | 51 (23.94) | 0.071 |
| ARB, n (%) | 123 (28.87) | 58 (27.23) | 65 (30.52) | 0.454 |
| CCB, n (%) | 139 (32.63) | 65 (30.52) | 74 (34.74) | 0.352 |
| PPI, n (%) | 196 (46.01) | 95 (44.60) | 101 (47.42) | 0.56 |

**Notes:** #Quantitative data areexpressedasmean± standard deviation or median (1st-3rd quartiles). *Variable is significantly different between HTPR and non-HTPR groups at *p* value < 0.05. Qualitative data are presented as numbers (%).

**Abbreviations:** BMI, body mass index; PCI, percutaneous coronary intervention; HbA1c, Hemoglobin A1c; TC, total cholesterol; LDL-C, low-density lipoprotein cholesterol; HDL-C, high-density lipoprotein cholesterol; TG, triglycerides; BUN, blood urea nitrogen; Cr, creatinine; UA, uric acid; HCY, homocysteine; CRP, C-reactive protein; ACEI, angiotensin-converting enzyme inhibitor; ARB, angiotensin receptor blocker; CCB, calcium channel blocker; PPI, proton-pump inhibitor.

**Table S2** Distribution of *CYP2C19*2*, **3*, and **17* genotypes in the IS study population without T2DM

| **Gene** | **SNP ID** | **Genotype/allele** | **Number** | **Frequency (%)** | **HWE *p* value*** |
| --- | --- | --- | --- | --- | --- |
| *CYP2C19*2* | rs4244285 | GG | 196 | 46.01 | 0.307 |
| GA | 179 | 42.02 |
| AA | 51 | 11.97 |
| Any A allele | 281 | 32.98 |
| *CYP2C19*3* | rs4986893 | GG | 379 | 88.97 | 0.597 |
| GA | 45 | 10.56 |
| AA | 2 | 0.47 |
| Any A allele | 49 | 5.75 |
| *CYP2C19*17* | rs12248560 | CC | 409 | 96.01 | 0.674 |
| CT | 17 | 3.99 |
| TT | 0 | 0.00 |
| Any T allele | 17 | 2.00 |

**Note:** *The genetic polymorphism distribution is considered to deviate from HWE at *p* value < 0.05.

**Table S3** Distribution of *CYP2C19*2*, **3*, and **17* genotypes among clopidogrel responders and non-responders in the IS study population without T2DM

| **Gene** | **SNP ID** | **Genotype/allele** | **HTPR** | **Non-HTPR** | ***p* value*** |
| --- | --- | --- | --- | --- | --- |
| **(n = 213)** | **(n = 213)** |
| *CYP2C19*2* | rs4244285 | GG, n (%) | 94 (44.13) | 102 (47.89) | 0.524 |
| GA, n (%) | 90 (42.25) | 89 (41.78) |  |
| AA, n (%) | 29 (13.62) | 22 (10.33) |  |
| *CYP2C19*3* | rs4986893 | GG, n (%) | 188 (88.26) | 191 (89.67) | 0.876 |
| GA, n (%) | 24 (11.27) | 21 (9.86) |  |
| AA, n (%) | 1 (0.47) | 1 (0.47) |  |
| *CYP2C19*17* | rs12248560 | CC, n (%) | 206 (96.71) | 203 (95.31) | 0.458 |
| CT, n (%) | 7 (3.29) | 10 (4.69) |  |
| TT, n (%) | 0 (0) | 0 (0) |  |

**Note:** *Variable is significantly different between HTPR and non-HTPR groups at *p* value < 0.05.
